# Supplementary material
Source: publisher figshare collection journal article supplement (https://rs.figshare.com/ndownloader/files/13138196)
Supplement: Supplementary file 1 [file 13138196]

Plate	Well	Body area	Testis area right	Testes area (combined)	Testis area left	Ovary area right	Ovaries area (combined)	Ovary area left	Sex allocation	Treatment	Treatment_2
Ah3	B6	159120.359	4304.816	9088.21	4783.391	1978.376	3633.11	1654.732	0.71	iso	iso
Bh3	C1	120832.306	2128.743	6436.73	4307.983	2535.43	4446.83	1911.402	0.59	iso	iso		Legend
Ch3	A5	143652.483	1797.774	6840.03	5042.259	NA	1368.48	684.24	0.83	iso	iso		Plate'= Coded name of the 24-well plate
Ch3	D6	226000	NA	7737.61	3868.806	NA	8433.56	4216.78	0.48	iso	iso		Well'= Coded name of the well inside the plate (letter for row & number for column)
Ch3	C3	129175.882	NA	6986.76	3493.38	NA	1785.74	892.869	0.8	iso	iso		Body area'= Total body area as measured in 'ImageJ' in µm^2
Ch3	D2	282073.249	NA	8626.22	4313.111	NA	3011.68	1505.842	0.74	iso	iso		Testis area right'= Area of the right testis as measured in 'ImageJ' in µm^2
Ch3	B2	120996.46	NA	7371.56	3685.781	NA	1339.4	669.702	0.85	iso	iso		Testes area (combined)'= Sum of 'Testes area right' and 'Testes area left', if one missing two times the existing measure used
Fh3	C5	167649.857	3076.155	4358.4	1282.247	3594.443	4702.56	1108.113	0.48	iso	iso		Testis area left'= Area of the left testes as measured in 'ImageJ' in µm^2
Fh3	C3	150765.9	3961.62	7923.24	NA	2827.272	5654.54	NA	0.58	iso	iso		Ovary area right'= Area of the right ovary as measured in 'ImageJ' in µm^2
Gh3	B2	163164.18	4331.029	7096.39	2765.358	2635.22	4400.09	1764.867	0.62	iso	iso		Ovaries area (combined)'= Sum of 'Ovary area right' and 'Ovary area left', if one missing two times the existing measure used
Gh3	C3	127637.547	2750.28	4092.93	1342.651	3891.626	5486.03	1594.407	0.43	iso	iso		Ovary area left'= Area of the left ovary as measured in 'ImageJ' in µm^2
Ih3	B4	166759.251	8724.726	15627.1	6902.374	2262.938	4325.63	2062.693	0.78	iso	iso		Sex allocation'= Calculated SA from 'Testes area (combined)'/'Testes area (combined)'+'Ovaries area (combined)'
Ih3	C1	282056.38	NA	11703.72	5851.859	NA	7228.15	3614.074	0.62	iso	iso		Treatment'= Exact treatment as group size ('iso'=isolated; 'pair'= pair; '8-x'=octet with x giving the real number of worms at experiment end)
Ih3	D4	129853.54	3442.465	5548.13	2105.663	2053.869	4107.74	NA	0.57	iso	iso		Treatment_2'= Intended treatment as group size ('iso'=isolated; 'pair'= pair; 'octet'=octet)
Ih3	B6	447513.461	13646.865	27293.73	NA	3910.401	7820.8	NA	0.78	iso	iso
Ih3	C5	160189.449	5173.366	12308.88	7135.514	1594.509	3630.03	2035.523	0.77	iso	iso
Jh3	D4	202510.802	NA	7310.77	3655.387	NA	2757.99	1378.994	0.73	iso	iso
Jh3	C3	191455.142	4303.554	6631.4	2327.849	4231.949	6402.83	2170.879	0.51	iso	iso
Jh3	B6	234666.375	9009.221	13933.19	4923.965	2237.762	4942.13	2704.369	0.74	iso	iso
Kh3	A5	335174.194	9057.228	24293.93	15236.697	8889.473	16244.82	7355.345	0.6	iso	iso
Kh3	D6	148500.932	NA	4104.76	2052.382	NA	4581.46	2290.728	0.47	iso	iso
Kh3	B6	217798.018	4034.037	9856.18	5822.142	3993.118	6703.45	2710.33	0.6	iso	iso
Lh3	A1	417729.511	8262.47	16524.94	NA	10501.393	21002.79	NA	0.44	iso	iso
Lh3	B2	221044.646	4538.193	8711.44	4173.247	2883.822	6745.46	3861.639	0.56	iso	iso
Mh3	C3	119110.952	NA	6863.16	3431.579	NA	2305.23	1152.616	0.75	iso	iso
Mh3	B2	223129.135	NA	7327.27	3663.637	NA	4551.23	2275.616	0.62	iso	iso
Mh3	A3	139906.318	NA	3904.42	1952.209	NA	2281.9	1140.952	0.63	iso	iso
Mh3	B6	148519.252	6281.288	11850.04	5568.751	743.235	2585.33	1842.096	0.82	iso	iso
Nh3	C5	162120.303	4713.048	8220.59	3507.545	1159.783	2319.57	NA	0.78	iso	iso
Nh3	B4	152145.341	NA	4261.47	2130.737	NA	1371.25	685.626	0.76	iso	iso
Nh3	D6	123246.191	3989.072	7457.03	3467.956	1023.402	1645.77	622.371	0.82	iso	iso
Nh3	C3	110646.935	3031.326	6062.65	NA	1265.906	2531.81	NA	0.71	iso	iso
Oh3	C3	113317.664	5519.594	9185.36	3665.767	1256.17	2863.37	1607.198	0.76	iso	iso
Oh3	C1	135164.886	NA	5172.69	2586.345	NA	2074.39	1037.195	0.71	iso	iso
Oh3	D2	215229.773	4002.46	10340.17	6337.713	3744.1	5461.56	1717.457	0.65	iso	iso
Oh3	B6	88853.221	5507.288	7562.54	2055.255	NA	959.34	479.668	0.89	iso	iso
Ph3	A1	117574.25	5971.066	11942.13	NA	1497.457	2994.91	NA	0.8	iso	iso
Ph3	D4	182685.671	NA	21089.69	10544.847	NA	2978.82	1489.411	0.88	iso	iso
Ph3	C1	144430.085	3648.626	7753.77	4105.146	1694.997	2856.84	1161.845	0.73	iso	iso
Qh3	C1	141538.792	NA	3263.28	1631.641	NA	4983.43	2491.716	0.4	iso	iso
Qh3	A3	273640.98	NA	10961.45	5480.726	NA	7130.51	3565.255	0.61	iso	iso
Rh3	A1	147061.82	NA	9126.47	4563.233	NA	3103.26	1551.629	0.75	iso	iso
Rh3	C3	127449.99	3977.69	7955.38	NA	1541.633	3083.27	NA	0.72	iso	iso
Rh3	C5	153298.96	15362.745	30725.49	NA	1124.42	2248.84	NA	0.93	iso	iso
Rh3	A3	145051.33	1979.694	4305.01	2325.314	1424.297	3341.38	1917.082	0.56	iso	iso
Sh3	A5	152082.762	3722.598	8481.44	4758.846	1767.346	3311.47	1544.124	0.72	iso	iso
Sh3	D6	170510.314	2253.911	4507.82	NA	2486.747	4973.49	NA	0.48	iso	iso
Sh3	C5	141022.749	2666.977	5111.62	2444.644	1221.99	2441.68	1219.691	0.68	iso	iso
Sh3	D2	144957.193	1632.96	3265.92	NA	1143.319	2286.64	NA	0.59	iso	iso
Sh3	B6	131988.817	1489.546	3656.27	2166.72	1705.715	2162.6	456.881	0.63	iso	iso
Th3	B6	250171.98	3436.819	7803.71	4366.888	1324.901	3130.72	1805.82	0.71	iso	iso
Th3	A5	152282.468	7747.709	15817.81	8070.102	1821.811	3339.15	1517.336	0.83	iso	iso
Th3	B2	183665.518	4269.679	7872.83	3603.154	2635.738	4788.63	2152.893	0.62	iso	iso
Th3	C5	209097.111	4431.72	7841.03	3409.31	2314.055	4070.04	1755.987	0.66	iso	iso
Uh3	A3	184955.54	4009.32	9470.29	5460.97	2127.23	4475.13	2347.9	0.68	iso	iso
Uh3	D4	123992.78	NA	4985.19	2492.6	NA	4207.95	2103.97	0.54	iso	iso
Uh3	C1	296255.82	4423.54	8847.08	NA	3147.19	6294.37	NA	0.58	iso	iso
Uh3	C5	173019.07	3619.46	7155.91	3536.45	1670.09	2966.76	1296.67	0.71	iso	iso
Vh3	D2	258081.32	4887.28	9774.57	NA	2506.86	5013.72	NA	0.66	iso	iso
Vh3	A5	114158.39	2730.54	4691.81	1961.27	1861.12	2706.89	845.77	0.63	iso	iso
Vh3	D4	75855.82	1270.78	7232.61	5961.84	404.68	1157.08	752.4	0.86	iso	iso
Vh3	B2	158555.89	2745.16	4933.69	2188.53	1788.34	3971.26	2182.91	0.55	iso	iso
Vh3	A3	166691.05	NA	4902.16	2451.08	NA	4281.17	2140.59	0.53	iso	iso
Vh3	B4	327975.71	NA	15265.59	7632.8	NA	4679.36	2339.68	0.77	iso	iso
Ah3	D5	113943.808	5891.459	11782.92	NA	725.553	1451.11	NA	0.89	pair	pair
Ah3	A2	153862.522	NA	9905.2	4952.6	NA	4771.25	2385.627	0.67	pair	pair
Ch3	D1	203373.837	NA	12671.3	6335.651	NA	1096.19	548.095	0.92	pair	pair
Ch3	C4	317923.112	14293.128	36628.84	22335.71	3472.554	7495.43	4022.88	0.83	pair	pair
Fh3	D1	110162.091	2854.78	3388.61	533.828	2327.77	4655.54	NA	0.42	pair	pair
Fh3	A2	113285.377	1220.097	1475.01	254.912	2137.206	4274.41	NA	0.26	pair	pair
Fh3	D5	124432.819	7810.626	9066.39	1255.764	8284.051	9494.23	1210.18	0.49	pair	pair
Fh3	B3	106716.663	4145.975	5775.45	1629.477	3013.34	5674.43	2661.094	0.5	pair	pair
Gh3	A2	223233.069	5248.454	7245.97	1997.511	10841.895	13578.43	2736.531	0.35	pair	pair
Gh3	B3	161084.589	8540.969	11530.68	2989.708	8754.816	10812.31	2057.498	0.52	pair	pair
Hh3	B3	131869.828	7233.366	9384.79	2151.428	7181.459	14362.92	NA	0.4	pair	pair
Ih3	D1	290206.237	14364.203	35177.31	20813.111	3090.738	5707.21	2616.468	0.86	pair	pair
Ih3	B3	203431.155	NA	12828.24	6414.119	NA	7994.03	3997.017	0.62	pair	pair
Ih3	C4	362476.783	14073.41	26722.14	12648.73	NA	7127.27	3563.633	0.79	pair	pair
Jh3	A6	252500.251	19071.673	29898.48	10826.806	4370.562	7365.85	2995.286	0.8	pair	pair
Jh3	D5	138105.154	5036.85	9018.49	3981.635	827.552	3484.92	2657.364	0.72	pair	pair
Jh3	A2	326721.06	NA	15131.92	7565.958	NA	7971.38	3985.692	0.65	pair	pair
Kh3	A6	147284.739	NA	3712.34	1856.171	NA	1832.93	916.467	0.67	pair	pair
Kh3	D5	191873.237	5713.415	11426.83	NA	3306.714	6613.43	NA	0.63	pair	pair
Kh3	D1	323592.333	6134.223	12268.45	NA	2303.541	4607.08	NA	0.73	pair	pair
Kh3	B3	292671.091	8416.679	16833.36	NA	2521.366	5042.73	NA	0.77	pair	pair
Lh3	B3	218666.131	3928.15	10876.64	6948.488	3793.764	5344.06	1550.299	0.67	pair	pair
Lh3	C1	144267.019	6403.087	11945.24	5542.155	560.198	1317.05	756.848	0.9	pair	pair
Lh3	B4	129307.024	NA	11433.52	5716.762	NA	3022.98	1511.488	0.79	pair	pair
Mh3	D5	167804.579	4068.386	7355.67	3287.286	2151.642	4485.48	2333.833	0.62	pair	pair
Mh3	B3	139260.402	5236.79	10677	5440.213	2136.394	3623.37	1486.977	0.75	pair	pair
Mh3	C4	64165.856	NA	3111.75	1555.877	NA	2239.71	1119.856	0.58	pair	pair
Mh3	D1	147888.754	5819.234	9174.75	3355.511	2814.853	4264.51	1449.653	0.68	pair	pair
Mh3	A2	136654.066	6449.111	19335.57	12886.456	986.044	2128.35	1142.304	0.9	pair	pair
Mh3	A6	142596.635	5898.209	11997	6098.792	1487.518	3388.03	1900.516	0.78	pair	pair
Nh3	A6	203300.013	8691.448	13458.54	4767.096	1990.006	3980.01	NA	0.77	pair	pair
Nh3	D5	87422.992	4137.241	8469.97	4332.731	650.669	1159.28	508.607	0.88	pair	pair
Oh3	A6	144627.796	4024.03	7766.27	3742.24	1472.913	2934.55	1461.632	0.73	pair	pair
Oh3	B3	137779.203	6164.65	8851.81	2687.16	1274.122	3433.64	2159.519	0.72	pair	pair
Oh3	C4	153836.221	6807.509	9071.82	2264.313	NA	1254.07	627.037	0.88	pair	pair
Oh3	A2	241033.388	12194.316	24388.63	NA	3235.661	6471.32	NA	0.79	pair	pair
Ph3	D1	109544.29	2389.65	4779.3	NA	1777.962	3555.92	NA	0.57	pair	pair
Ph3	B3	94984.251	NA	2309.42	1154.712	NA	1729.41	864.707	0.57	pair	pair
Ph3	A2	100406.424	1916.71	4113.94	2197.226	865.89	1984.06	1118.165	0.67	pair	pair
Qh3	B5	163075.12	4776.246	9552.49	NA	2449.287	4898.57	NA	0.66	pair	pair
Qh3	C2	245565.32	NA	6330.01	3165.003	NA	5800.87	2900.433	0.52	pair	pair
Qh3	A6	268579.94	4832.413	10944.39	6111.977	4042.928	8832.03	4789.105	0.55	pair	pair
Qh3	C6	198309.72	6369.403	13289.49	6920.09	1601.755	3729.22	2127.469	0.78	pair	pair
Qh3	D1	128913.96	1688.54	4670.13	2981.594	1701.319	3112.5	1411.179	0.6	pair	pair
Qh3	B1	138898.54	5166.097	9727.37	4561.273	940.504	1794.12	853.618	0.84	pair	pair
Qh3	A4	138177.71	4285.749	5376.09	1090.341	NA	4446.9	2223.45	0.55	pair	pair
Qh3	D3	143902.98	3376.674	9059.02	5682.345	1876.851	3634.66	1757.813	0.71	pair	pair
Qh3	C4	152775.48	2728.677	6223.51	3494.833	882.794	1895.82	1013.023	0.77	pair	pair
Qh3	B3	125926.53	4540.785	6362.29	1821.507	1682.252	2393.57	711.32	0.73	pair	pair
Rh3	A6	199293.2	NA	6436.57	3218.284	NA	3125.8	1562.898	0.67	pair	pair
Rh3	A2	160139.93	3256.69	6728.97	3472.283	1320.732	1760	439.267	0.79	pair	pair
Rh3	D1	130201.44	5288.82	10577.64	NA	1178.986	2357.97	NA	0.82	pair	pair
Rh3	D3	153616.38	3678.985	18311.05	14632.064	747.697	1759.06	1011.366	0.91	pair	pair
Rh3	C6	137625.75	NA	1974.25	987.126	NA	3796.5	1898.251	0.34	pair	pair
Rh3	D5	119961.47	6040.507	9453.9	3413.39	2472.311	3876.12	1403.809	0.71	pair	pair
Sh3	D1	164555.048	3410.753	8278.63	4867.877	1046.56	1586.74	540.184	0.84	pair	pair
Sh3	A4	214129.122	6267.798	10956.63	4688.83	1481.568	3126.23	1644.657	0.78	pair	pair
Sh3	C6	144310.371	13251.075	26502.15	NA	1576.636	3153.27	NA	0.89	pair	pair
Sh3	D3	208876.908	5738.568	11268.85	5530.277	1156.808	1962.42	805.611	0.85	pair	pair
Sh3	D5	142049.394	2044.403	6829.99	4785.589	580.652	1377.2	796.55	0.83	pair	pair
Sh3	B5	142844.046	4870.988	9621.79	4750.8	628.186	1514.5	886.31	0.86	pair	pair
Sh3	C4	164599.306	NA	6229.93	3114.967	NA	1613.45	806.726	0.79	pair	pair
Th3	B1	166450.713	4427.325	7150.8	2723.47	1451.816	2046.16	594.344	0.78	pair	pair
Th3	D3	78596.385	3010.94	10119.71	7108.772	193.314	465.74	272.425	0.96	pair	pair
Th3	A4	317469.284	6629.747	15920.62	9290.875	6334.13	9909.73	3575.601	0.62	pair	pair
Uh3	C2	184484.66	3361.8	7434.17	4072.38	486.06	1367.09	881.04	0.84	pair	pair
Uh3	D1	116594.4	4040.02	7579.01	3538.99	1198.87	1683.33	484.47	0.82	pair	pair
Uh3	A6	147051.66	7009.82	14019.63	NA	1479.01	2958.02	NA	0.83	pair	pair
Uh3	B1	145568.28	5264.29	13523.61	8259.33	1069.14	2906.74	1837.6	0.82	pair	pair
Uh3	C6	150887.43	NA	10714.77	5357.38	NA	3727.2	1863.6	0.74	pair	pair
Uh3	A4	300214.03	13437.83	29122.03	15684.2	1401.47	3758.63	2357.16	0.89	pair	pair
Uh3	B3	124835.5	3327.42	15657.29	12329.88	999.03	1932.9	933.88	0.89	pair	pair
Uh3	A2	274273.83	14390.99	28781.54	14390.55	1740.74	3203.38	1462.64	0.9	pair	pair
Vh3	B5	203229.82	6668.53	19377.08	12708.56	1855.65	2069.96	214.31	0.9	pair	pair
Vh3	A6	185367.65	NA	8418.8	4209.4	NA	4023.22	2011.61	0.68	pair	pair
Vh3	B1	193641.39	9613.71	19227.42	NA	3161.08	6322.16	NA	0.75	pair	pair
Vh3	A2	133507.56	5614.19	11228.38	NA	805.85	1611.69	NA	0.87	pair	pair
Vh3	C4	181690.41	NA	7722.29	3861.14	NA	5095.54	2547.77	0.6	pair	pair
Vh3	B3	184347.53	15685.31	17530.18	1844.87	1975.87	4089.28	2113.41	0.81	pair	pair
Vh3	C2	129457.39	12505.61	25617.29	13111.69	1591.68	3320.79	1729.11	0.89	pair	pair
Vh3	D5	127226.53	10820.45	21640.9	NA	1452.43	2904.85	NA	0.88	pair	pair
Vh3	C6	188801.1	23163	28966.38	5803.38	3119.57	4451.19	1331.63	0.87	pair	pair
Vh3	D3	286974.66	13572	24052.04	10480.04	2019.39	4097.87	2078.48	0.85	pair	pair
Ah3	A4	193791.938	7450.841	30613.08	23162.237	1900.753	4203.03	2302.279	0.88	8 – 6	octet
Bh3	B5	185510.214	21788.438	43576.88	NA	1711.665	3423.33	NA	0.93	8 – 6	octet
Ch3	B1	90242.094	3858.709	7717.42	NA	1436.941	2873.88	NA	0.73	8 – 6	octet
Ch3	B5	139871.31	NA	6666.87	3333.434	NA	4211.73	2105.866	0.61	8 – 6	octet
Dh3	A4	126541.976	4802.898	9637.69	4834.79	819.607	1639.21	NA	0.85	8 – 6	octet
Dh3	B1	104691.85	4107.175	6665.9	2558.724	543.835	967.18	423.344	0.87	8 – 6	octet
Fh3	B1	128108.788	2562.713	5125.43	NA	4669.3	5652.53	983.226	0.48	8 – 6	octet
Gh3	A4	152871.973	2963.27	4732.85	1769.578	5786.542	7643.34	1856.802	0.38	8 – 6	octet
Ih3	C6	188695.353	9587.405	29386.91	19799.503	2946.468	5353.94	2407.467	0.85	8 – 6	octet
Jh3	B1	234729.316	NA	17377.46	8688.732	NA	3017.14	1508.569	0.85	8 – 6	octet
Jh3	B5	157480.63	NA	14445.48	7222.739	NA	4196.86	2098.428	0.77	8 – 6	octet
Kh3	B1	195937.554	NA	14964.3	7482.148	NA	5221.78	2610.89	0.74	8 – 6	octet
Kh3	D3	266828.841	15553.388	30802.63	15249.24	2761.166	6668.15	3906.987	0.82	8 – 6	octet
Kh3	A4	262643.54	8955.962	17911.92	NA	1760.01	3520.02	NA	0.84	8 – 6	octet
Lh3	C2	257624.951	NA	26068.3	13034.152	NA	10066.91	5033.457	0.72	8 – 6	octet
Lh3	A4	296584.133	NA	25340.24	12670.119	NA	15088.98	7544.49	0.63	8 – 6	octet
Lh3	C6	250797.036	10629.3	17687.09	7057.79	2136.665	5213.26	3076.595	0.77	8 – 6	octet
Mh3	B1	141752.283	NA	13429.55	6714.774	NA	1401.07	700.535	0.91	8 – 6	octet
Mh3	D3	255878.566	12208.775	22487.54	10278.767	2377.445	5210.45	2833.008	0.81	8 – 6	octet
Oh3	A4	166019.015	23202.187	46404.37	NA	1473.206	2946.41	NA	0.94	8 – 6	octet
Ph3	A4	314986.653	NA	22786.25	11393.123	NA	6284.03	3142.013	0.78	8 – 6	octet
Ph3	B1	228519.384	NA	14188.56	7094.28	NA	5836	2918.001	0.71	8 – 6	octet
Ah3	C6	144958.127	32226.362	35346.04	3119.677	1716.634	2670.29	953.656	0.93	8 – 7	octet
Bh3	B1	166145.078	14993.404	35960.95	20967.546	2494.861	5753.82	3258.955	0.86	8 – 7	octet
Bh3	C6	143798.862	8497.255	16118.82	7621.56	1279.227	1569.87	290.647	0.91	8 – 7	octet
Ch3	C2	105409.414	6873.683	13747.37	NA	1228.312	2456.62	NA	0.85	8 – 7	octet
Ch3	A4	292120.766	NA	15464.34	7732.169	NA	5912.95	2956.475	0.72	8 – 7	octet
Dh3	C2	108682.343	3468.452	6936.9	NA	1067.656	2135.31	NA	0.76	8 – 7	octet
Fh3	D3	135005.267	4842.769	5792.55	949.779	5522.817	6951	1428.185	0.45	8 – 7	octet
Gh3	C2	308204.811	4689.529	8412.32	3722.789	7192.909	10839.37	3646.462	0.44	8 – 7	octet
Ih3	B1	253749.094	15765.838	26697.92	10932.084	4226.168	7434.34	3208.175	0.78	8 – 7	octet
Ih3	B5	442790.713	22939.656	45879.31	NA	4719.426	9438.85	NA	0.83	8 – 7	octet
Kh3	B5	475465.957	25739.285	55967.72	30228.434	4661.863	8592.29	3930.427	0.87	8 – 7	octet
Lh3	D3	165047.511	NA	15240.51	7620.253	NA	2897.41	1448.706	0.84	8 – 7	octet
Lh3	B5	327765.663	10003.919	24559.6	14555.681	1797.909	5229.08	3431.173	0.82	8 – 7	octet
Lh3	B1	246351.627	12943.152	25886.3	NA	2763.668	5527.34	NA	0.82	8 – 7	octet
Mh3	B5	239827.715	9940.18	25654.58	15714.404	1250.817	3964.48	2713.666	0.87	8 – 7	octet
Nh3	A4	320775.226	18434.133	34002.89	15568.76	2562.51	5649.21	3086.703	0.86	8 – 7	octet
Nh3	C2	166198.405	6644.724	16782.47	10137.743	685.727	3023.7	2337.969	0.85	8 – 7	octet
Oh3	D3	111795.653	NA	4956.66	2478.328	NA	1252.9	626.451	0.8	8 – 7	octet
Oh3	C2	195466.857	NA	16282.99	8141.494	NA	5643.77	2821.885	0.74	8 – 7	octet
Oh3	B5	205892.382	10924.105	20105.71	9181.608	1383.085	2781.11	1398.028	0.88	8 – 7	octet
Oh3	C6	137024.638	3895.627	7791.25	NA	1720.218	3440.44	NA	0.69	8 – 7	octet
Ph3	C6	184813.511	11591.745	20409.87	8818.127	1515.781	3045.19	1529.406	0.87	8 – 7	octet
Ph3	B5	208989.186	NA	24257.84	12128.921	NA	3560.52	1780.261	0.87	8 – 7	octet
Ph3	C2	190522.636	9115.772	23949.55	14833.774	1663.387	2829.63	1166.24	0.89	8 – 7	octet
Ah3	C2	191944.521	NA	16795.88	8397.938	NA	6113.32	3056.659	0.73	8 – 8	octet
Bh3	C2	201390.925	8082.408	15923.8	7841.391	1819.276	2553.48	734.208	0.86	8 – 8	octet
Gh3	B5	129203.272	7852.232	9407.54	1555.303	4872.329	8727.65	3855.317	0.52	8 – 8	octet
Hh3	C2	190614.055	3537.116	4148.03	610.91	6060.184	12120.37	NA	0.25	8 – 8	octet
Ih3	A4	267324.206	4291.789	17676.44	13384.651	NA	5081.95	2540.975	0.78	8 – 8	octet
Ih3	C2	131403.666	NA	8359.97	4179.986	NA	1879.86	939.93	0.82	8 – 8	octet
Jh3	D3	147337.885	6238.566	15227.47	8988.902	1959.342	3413.56	1454.217	0.82	8 – 8	octet
Kh3	C6	371367.783	NA	29030.4	14515.201	NA	8964.46	4482.229	0.76	8 – 8	octet
Mh3	A4	148449.056	9471.241	18259.26	8788.015	1527.31	4418.6	2891.293	0.81	8 – 8	octet
Mh3	C2	169483.307	7696.141	15342.6	7646.454	955.177	1953.12	997.944	0.89	8 – 8	octet
Nh3	C6	181260.702	5952.021	12883.65	6931.63	963.19	1575.59	612.398	0.89	8 – 8	octet
Oh3	B1	410983.22	16920.921	33841.84	NA	4360.419	8720.84	NA	0.8	8 – 8	octet
